# Supplementary material for: The role of covalency in enhancing stability of Eu and Am complexes: a DFT comparison of BTP and BTPhen
Source: Royal Society of Chemistry journal article supplement (doi:10.1039/d3cp01832f), 2023-01-01
Supplement: d3cp01832f1.pdf [file d3cp01832f1.pdf]

The role of covalency in enhancing stability of Eu and Am complexes: A DFT comparison of BTP and  
BTPhen

Izaak Fryer-Kanssen, Thomas Malcomson, Jonathan Austin, Andrew Kerridge

1. BHLYP-optimised and B3LYP-optimised Cartesian coordinates of all structures, obtained using the def(2)-SVP basis set and the COSMO continuum solvent model.

Eu(H<sub>2</sub>O)<sub>9</sub>

BHLYP

|    |            |            |            |
|----|------------|------------|------------|
| Eu | 0.0097529  | -0.0000378 | -0.0047579 |
| O  | 0.0038761  | 1.6487746  | 1.7879017  |
| O  | 2.1489085  | -0.0003933 | 1.2208750  |
| O  | 0.0147020  | -0.0001083 | -2.4711240 |
| O  | -1.5376702 | -1.6583733 | -0.8902834 |
| O  | 1.5403763  | -1.6635036 | -0.8898933 |
| O  | 0.0051824  | -1.6487527 | 1.7875453  |
| O  | -2.1416886 | -0.0001885 | 1.2258835  |
| O  | -1.5370309 | 1.6583417  | -0.8916690 |
| O  | 1.5413057  | 1.6634367  | -0.8881132 |
| H  | 1.3964769  | -2.1634615 | -1.6955012 |
| H  | 2.1677201  | -2.1705637 | -0.3711095 |
| H  | -2.1933542 | -2.1342650 | -0.3772952 |
| H  | -1.4243125 | -2.1553137 | -1.7026012 |
| H  | -0.7596006 | -2.1424189 | 2.0891309  |
| H  | 0.7725485  | -2.1339969 | 2.0963983  |
| H  | -3.0209731 | 0.0005440  | 0.8419227  |
| H  | -2.2695332 | 0.0002837  | 2.1768277  |
| H  | 2.2707379  | 0.0002079  | 2.1726214  |
| H  | 3.0301572  | -0.0004833 | 0.8411919  |
| H  | -0.7544507 | 0.0000212  | -3.0447979 |
| H  | 0.7783961  | 0.0005718  | -3.0520838 |
| H  | 1.4005621  | 2.1661257  | -1.6926048 |
| H  | 2.1677762  | 2.1681153  | -0.3659669 |
| H  | -2.1945737 | 2.1358139  | -0.3825227 |
| H  | -1.4214078 | 2.1525165  | -1.7053384 |
| H  | -0.7629822 | 2.1408127  | 2.0868274  |
| H  | 0.7690986  | 2.1362949  | 2.0985367  |

B3LYP

|    |            |            |            |
|----|------------|------------|------------|
| Eu | 0.0156966  | -0.0001037 | -0.0066145 |
| O  | 0.0037168  | 1.6478913  | 1.8026633  |
| O  | 2.1604508  | -0.0008913 | 1.2171406  |
| O  | 0.0265515  | 0.0011971  | -2.4798308 |
| O  | -1.5504114 | -1.6544842 | -0.8991547 |
| O  | 1.5506396  | -1.6699784 | -0.8960938 |
| O  | 0.0059830  | -1.6489925 | 1.8017107  |
| O  | -2.1466560 | -0.0003914 | 1.2322636  |
| O  | -1.5494969 | 1.6553139  | -0.8997949 |
| O  | 1.5518097  | 1.6698781  | -0.8938205 |
| H  | 1.3786340  | -2.1868546 | -1.6984063 |
| H  | 2.1479258  | -2.2128292 | -0.3583818 |

|   |            |            |            |
|---|------------|------------|------------|
| H | -2.1880476 | -2.1488482 | -0.3612912 |
| H | -1.4051259 | -2.1935423 | -1.6920699 |
| H | -0.7731926 | -2.1541976 | 2.0807653  |
| H | 0.7713065  | -2.1756797 | 2.0797711  |
| H | -3.0370979 | 0.0023538  | 0.8475114  |
| H | -2.2781195 | -0.0025601 | 2.1934086  |
| H | 2.2863392  | 0.0031051  | 2.1789175  |
| H | 3.0514627  | -0.0016019 | 0.8336517  |
| H | -0.7502670 | -0.0027980 | -3.0608334 |
| H | 0.7968009  | 0.0024509  | -3.0695772 |
| H | 1.3832909  | 2.1911203  | -1.6940417 |
| H | 2.1515065  | 2.2070491  | -0.3531235 |
| H | -2.1852620 | 2.1564606  | -0.3660022 |
| H | -1.4024758 | 2.1872014  | -1.6972156 |
| H | -0.7800917 | 2.1472975  | 2.0791852  |
| H | 0.7641299  | 2.1824341  | 2.0792630  |

Am(H<sub>2</sub>O)<sub>9</sub>

## BHLYP

|    |            |            |            |
|----|------------|------------|------------|
| Am | 0.0050769  | -0.0000248 | -0.0011115 |
| O  | 0.0012094  | 1.6614900  | 1.8511282  |
| O  | 2.1654720  | -0.0002968 | 1.2425187  |
| O  | 0.0043694  | -0.0001132 | -2.4943286 |
| O  | -1.5939436 | -1.6694470 | -0.9214735 |
| O  | 1.6029775  | -1.6676871 | -0.9270055 |
| O  | 0.0027777  | -1.6617150 | 1.8504535  |
| O  | -2.1629958 | -0.0004273 | 1.2406571  |
| O  | -1.5933265 | 1.6695278  | -0.9227378 |
| O  | 1.6041999  | 1.6675767  | -0.9254977 |
| H  | 1.4746321  | -2.1580874 | -1.7413313 |
| H  | 2.2452659  | -2.1663980 | -0.4180868 |
| H  | -2.2556316 | -2.1414124 | -0.4120770 |
| H  | -1.4877534 | -2.1633489 | -1.7369214 |
| H  | -0.7638524 | -2.1484525 | 2.1594554  |
| H  | 0.7674709  | -2.1447758 | 2.1699689  |
| H  | -3.0437043 | 0.0004573  | 0.8595178  |
| H  | -2.2889476 | -0.0001036 | 2.1920481  |
| H  | 2.2865308  | 0.0005019  | 2.1944806  |
| H  | 3.0477718  | -0.0004671 | 0.8649314  |
| H  | -0.7647462 | -0.0000181 | -3.0682650 |
| H  | 0.7674337  | 0.0009248  | -3.0763601 |
| H  | 1.4792603  | 2.1607076  | -1.7387338 |
| H  | 2.2460296  | 2.1635707  | -0.4133769 |
| H  | -2.2566915 | 2.1431805  | -0.4170803 |
| H  | -1.4848961 | 2.1606627  | -1.7395560 |
| H  | -0.7675963 | 2.1467767  | 2.1569412  |
| H  | 0.7636074  | 2.1473979  | 2.1718426  |

## B3LYP

|    |            |            |            |
|----|------------|------------|------------|
| Am | 0.0224576  | -0.0000867 | -0.0102202 |
| O  | 0.0065111  | 1.6736373  | 1.8431946  |
| O  | 2.2091787  | -0.0009538 | 1.2116016  |
| O  | 0.0536441  | 0.0006925  | -2.5163959 |
| O  | -1.5827027 | -1.6819082 | -0.9215704 |
| O  | 1.5669558  | -1.7176510 | -0.9064702 |
| O  | 0.0081790  | -1.6741516 | 1.8422834  |
| O  | -2.1862714 | -0.0006886 | 1.2538457  |
| O  | -1.5819413 | 1.6822043  | -0.9225460 |
| O  | 1.5680616  | 1.7176672  | -0.9038565 |
| H  | 1.4143185  | -2.2274532 | -1.7174167 |
| H  | 2.1897816  | -2.2430946 | -0.3801384 |
| H  | -2.2532734 | -2.1511237 | -0.4010342 |
| H  | -1.4666847 | -2.2072891 | -1.7287880 |
| H  | -0.7737459 | -2.1559430 | 2.1542680  |
| H  | 0.7700866  | -2.1902980 | 2.1492017  |
| H  | -3.0790246 | 0.0009071  | 0.8743097  |
| H  | -2.3181874 | -0.0005652 | 2.2149355  |
| H  | 2.3437936  | 0.0015428  | 2.1723721  |
| H  | 3.0990878  | -0.0011598 | 0.8249980  |

|   |            |            |            |
|---|------------|------------|------------|
| H | -0.7173902 | -0.0008388 | -3.1053048 |
| H | 0.8272294  | 0.0012248  | -3.1020622 |
| H | 1.4194324  | 2.2305758  | -1.7136488 |
| H | 2.1914078  | 2.2392724  | -0.3743210 |
| H | -2.2538861 | 2.1541581  | -0.4062552 |
| H | -1.4639966 | 2.2034147  | -1.7321626 |
| H | -0.7782666 | 2.1532651  | 2.1513364  |
| H | 0.7652453  | 2.1946430  | 2.1498445  |

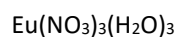

## BHLYP

|    |            |            |            |
|----|------------|------------|------------|
| Eu | 0.0833337  | -0.3095752 | 0.0762213  |
| N  | 2.9788606  | -0.1009617 | 0.1845115  |
| N  | -0.0072285 | 2.5619413  | -0.1081704 |
| N  | -2.8091558 | -0.3040370 | 0.1263374  |
| O  | 2.2469039  | 0.4611429  | 1.0281661  |
| O  | 2.3822990  | -0.7735759 | -0.6863518 |
| O  | -2.1520554 | -0.0072934 | -0.8982950 |
| O  | -2.1342972 | -0.6070769 | 1.1322553  |
| O  | -0.4326731 | 1.9402423  | 0.8917661  |
| O  | 0.4445746  | 1.8561743  | -1.0360791 |
| O  | -4.0001346 | -0.2970644 | 0.1369825  |
| O  | -0.0342783 | 3.7513149  | -0.1712786 |
| O  | 4.1653942  | -0.0040644 | 0.2074010  |
| O  | -0.1605841 | -2.6952840 | -0.0814830 |
| H  | -0.2177654 | -3.1344459 | -0.9326880 |
| O  | 0.3359806  | -1.0683201 | 2.3384985  |
| H  | 1.1059041  | -0.8611731 | 2.8726549  |
| H  | -0.3673575 | -1.3118881 | 2.9438887  |
| O  | 0.1083546  | -0.9699427 | -2.2589322 |
| H  | 0.9042779  | -0.9799041 | -2.7946463 |
| H  | -0.6270748 | -0.8267430 | -2.8583246 |
| H  | -0.4247629 | -3.3333623 | 0.5837405  |

## B3LYP

|    |            |            |            |
|----|------------|------------|------------|
| Eu | 0.0735393  | -0.3219590 | 0.0921784  |
| N  | 2.9770136  | -0.0552168 | 0.2144327  |
| N  | 0.0098414  | 2.5586381  | -0.1547612 |
| N  | -2.8287440 | -0.2952254 | 0.1617369  |
| O  | 2.2153974  | 0.5104668  | 1.0624806  |
| O  | 2.3911810  | -0.7843161 | -0.6500277 |
| O  | -2.1703855 | -0.0633474 | -0.9044744 |
| O  | -2.1315746 | -0.5664000 | 1.1897405  |
| O  | -0.4492776 | 1.9467082  | 0.8646631  |
| O  | 0.4608506  | 1.8199332  | -1.0863668 |
| O  | -4.0373854 | -0.2576796 | 0.1918844  |
| O  | 0.0136460  | 3.7665575  | -0.2294054 |
| O  | 4.1773665  | 0.0909465  | 0.2268389  |
| O  | -0.1660721 | -2.7229376 | -0.0994913 |
| H  | -0.2997189 | -3.0971921 | -0.9848370 |
| O  | 0.3805298  | -1.1408672 | 2.3447668  |
| H  | 1.1202935  | -0.8325577 | 2.8918550  |
| H  | -0.3241491 | -1.3996826 | 2.9592120  |
| O  | 0.1145317  | -1.0185495 | -2.2658649 |
| H  | 0.9400180  | -0.9949104 | -2.7755337 |
| H  | -0.5898023 | -0.7744182 | -2.8869339 |
| H  | -0.4885835 | -3.3818871 | 0.5340818  |

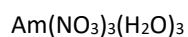

BHLYP

|    |            |            |            |
|----|------------|------------|------------|
| Am | -0.0389513 | -0.2763920 | 0.0107357  |
| N  | 2.8974431  | -0.2798011 | 0.0763189  |
| N  | 0.1456229  | 2.6618570  | -0.0192681 |
| N  | -2.9642697 | -0.0065146 | 0.0685300  |
| O  | 2.2129343  | 0.1705071  | 1.0227159  |
| O  | 2.2474775  | -0.7687913 | -0.8757816 |
| O  | -2.2928301 | 0.2104283  | -0.9668575 |
| O  | -2.3081817 | -0.3488466 | 1.0764630  |
| O  | -0.3408461 | 2.0247815  | 0.9434615  |
| O  | 0.5410171  | 1.9744984  | -0.9855450 |
| O  | -4.1491067 | 0.1044586  | 0.0888182  |
| O  | 0.2227190  | 3.8512500  | -0.0132643 |
| O  | 4.0866859  | -0.2461536 | 0.0810954  |
| O  | -0.5034044 | -2.6723861 | -0.3032285 |
| H  | -0.6027843 | -3.0530926 | -1.1786084 |
| O  | 0.0800390  | -1.2062021 | 2.2695828  |
| H  | 0.8737648  | -1.1890419 | 2.8089917  |
| H  | -0.6581877 | -1.3507749 | 2.8653064  |
| O  | -0.0823750 | -0.8091093 | -2.4077911 |
| H  | 0.7018606  | -0.8227163 | -2.9604777 |
| H  | -0.8204427 | -0.6019542 | -2.9849860 |
| H  | -0.8098165 | -3.3310416 | 0.3230435  |

B3LYP

|    |            |            |            |
|----|------------|------------|------------|
| Am | 0.0768997  | -0.3048614 | 0.0949825  |
| N  | 3.0154570  | -0.0609295 | 0.2093276  |
| N  | 0.0255023  | 2.6316202  | -0.1640478 |
| N  | -2.8712687 | -0.2743176 | 0.1614238  |
| O  | 2.2599574  | 0.4242149  | 1.1137685  |
| O  | 2.4177624  | -0.6847071 | -0.7273457 |
| O  | -2.2190822 | -0.0847359 | -0.9169344 |
| O  | -2.1647327 | -0.4750730 | 1.2018551  |
| O  | -0.4003371 | 2.0189929  | 0.8711613  |
| O  | 0.4579998  | 1.8922565  | -1.1045318 |
| O  | -4.0794873 | -0.2657321 | 0.1942688  |
| O  | 0.0158735  | 3.8389576  | -0.2428779 |
| O  | 4.2170738  | 0.0626753  | 0.2376277  |
| O  | -0.1465491 | -2.7538616 | -0.1004576 |
| H  | -0.2219603 | -3.1903962 | -0.9636356 |
| O  | 0.3005465  | -1.1823544 | 2.3863125  |
| H  | 1.0804505  | -0.9993432 | 2.9341228  |
| H  | -0.4305393 | -1.3513535 | 3.0014445  |
| O  | 0.0933367  | -1.0174207 | -2.3060856 |
| H  | 0.8937877  | -0.9673519 | -2.8521798 |
| H  | -0.6475881 | -0.8322366 | -2.9046453 |
| H  | -0.2845869 | -3.4379391 | 0.5726212  |

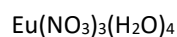

BHLYP

|    |            |            |            |
|----|------------|------------|------------|
| Eu | 0.8412857  | 0.0545926  | -0.0699300 |
| N  | 3.6970385  | -0.6074277 | -0.1928298 |
| N  | -0.0762729 | 2.7659343  | 0.5806617  |
| N  | -1.1239326 | -2.0278299 | -0.6033572 |
| O  | 3.2236932  | 0.3066661  | 0.5177056  |
| O  | 2.8950833  | -1.1903079 | -0.9460783 |
| O  | -1.2865023 | -1.1878556 | 0.3056889  |
| O  | -0.0707975 | -1.9293304 | -1.2665509 |
| O  | -0.7571274 | 1.7851251  | 0.9321119  |
| O  | 1.0246365  | 2.5110823  | 0.0436428  |
| O  | -1.9326382 | -2.8801885 | -0.8268385 |
| O  | -0.4482059 | 3.8907325  | 0.7447426  |
| O  | 4.8555427  | -0.9009031 | -0.1478153 |
| O  | 1.4237980  | -2.0047847 | 1.1971124  |
| H  | 1.0382704  | -2.1762715 | 2.0577080  |
| O  | 1.7160904  | 0.8881298  | -2.2081950 |
| H  | 2.4691837  | 0.4802957  | -2.6389931 |
| O  | 1.0133749  | 0.3434182  | 2.3631857  |
| H  | 0.4580279  | 0.9621510  | 2.8402416  |
| H  | 1.8584163  | 0.3197957  | 2.8164939  |
| O  | -0.8800876 | 0.8930536  | -1.6467909 |
| H  | -0.7677532 | 0.7941276  | -2.5934511 |
| H  | -1.8223716 | 0.8827560  | -1.4741177 |
| H  | 1.7670071  | 1.8288995  | -2.3891978 |
| H  | 1.5555985  | -2.8560264 | 0.7774533  |

B3LYP

|    |            |            |            |
|----|------------|------------|------------|
| Eu | 0.8432219  | 0.0597053  | -0.0653732 |
| N  | 3.7222138  | -0.5485526 | -0.1756479 |
| N  | -0.0116043 | 2.8077770  | 0.5800617  |
| N  | -1.1303450 | -2.0405510 | -0.5960529 |
| O  | 3.2130468  | 0.3548227  | 0.5626348  |
| O  | 2.9238146  | -1.1401031 | -0.9631603 |
| O  | -1.3003611 | -1.1801718 | 0.3239425  |
| O  | -0.0568953 | -1.9384569 | -1.2697401 |
| O  | -0.7114963 | 1.8295799  | 0.9772978  |
| O  | 1.0891460  | 2.5139601  | 0.0102884  |
| O  | -1.9466220 | -2.9112771 | -0.8192946 |
| O  | -0.3627603 | 3.9597123  | 0.7309716  |
| O  | 4.9034242  | -0.8225504 | -0.1261260 |
| O  | 1.4656030  | -2.0376578 | 1.1836492  |
| H  | 1.0021419  | -2.2068370 | 2.0183944  |
| O  | 1.6534153  | 0.8669899  | -2.2755243 |
| H  | 2.4450337  | 0.4334042  | -2.6315822 |
| O  | 0.9608588  | 0.2642495  | 2.4082011  |
| H  | 0.4138236  | 0.9598817  | 2.8058219  |
| H  | 1.8265277  | 0.3210374  | 2.8428920  |
| O  | -0.9203669 | 0.9242992  | -1.6243319 |
| H  | -0.7673515 | 0.7811778  | -2.5711091 |

|   |            |            |            |
|---|------------|------------|------------|
| H | -1.8636325 | 0.7606545  | -1.4747666 |
| H | 1.7937878  | 1.8201422  | -2.3930485 |
| H | 1.4867338  | -2.8854017 | 0.7142048  |



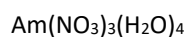

BHLYP

|    |            |            |            |
|----|------------|------------|------------|
| Am | 0.8480930  | 0.0587337  | -0.0607276 |
| N  | 3.7329804  | -0.6033127 | -0.1879149 |
| N  | -0.0751812 | 2.8016198  | 0.5780364  |
| N  | -1.1538015 | -2.0604699 | -0.6110139 |
| O  | 3.2810926  | 0.3096927  | 0.5363170  |
| O  | 2.9095091  | -1.1708173 | -0.9347636 |
| O  | -1.3159920 | -1.2223131 | 0.3007697  |
| O  | -0.0995839 | -1.9632613 | -1.2730739 |
| O  | -0.7348220 | 1.8058772  | 0.9387229  |
| O  | 1.0267861  | 2.5658216  | 0.0366605  |
| O  | -1.9645218 | -2.9101860 | -0.8371038 |
| O  | -0.4718071 | 3.9170836  | 0.7389322  |
| O  | 4.8864202  | -0.9137764 | -0.1655214 |
| O  | 1.4421222  | -2.0490827 | 1.2231212  |
| H  | 1.0386882  | -2.2297411 | 2.0738946  |
| O  | 1.7260965  | 0.9054417  | -2.2506956 |
| H  | 2.4781794  | 0.4937480  | -2.6802027 |
| O  | 1.0155386  | 0.3450583  | 2.4183693  |
| H  | 0.4610409  | 0.9761971  | 2.8807910  |
| H  | 1.8550210  | 0.3253035  | 2.8824255  |
| O  | -0.9147885 | 0.9117335  | -1.6711189 |
| H  | -0.7923318 | 0.8160308  | -2.6170737 |
| H  | -1.8593384 | 0.8882309  | -1.5114161 |
| H  | 1.7895993  | 1.8460980  | -2.4290790 |
| H  | 1.5623585  | -2.8978754 | 0.7942676  |

B3LYP

|    |            |            |            |
|----|------------|------------|------------|
| Am | 0.8512404  | 0.0673970  | -0.0603770 |
| N  | 3.7537291  | -0.5614229 | -0.1729416 |
| N  | -0.0364726 | 2.8294246  | 0.5848241  |
| N  | -1.1598733 | -2.0635799 | -0.6154118 |
| O  | 3.2752453  | 0.3609245  | 0.5617917  |
| O  | 2.9266539  | -1.1444927 | -0.9419812 |
| O  | -1.3230467 | -1.2140007 | 0.3164293  |
| O  | -0.0904266 | -1.9558536 | -1.2947971 |
| O  | -0.7112609 | 1.8215244  | 0.9631454  |
| O  | 1.0747825  | 2.5743583  | 0.0189271  |
| O  | -1.9799381 | -2.9298273 | -0.8440615 |
| O  | -0.4266076 | 3.9655262  | 0.7500005  |
| O  | 4.9271071  | -0.8652147 | -0.1399670 |
| O  | 1.4634616  | -2.0678091 | 1.2148930  |
| H  | 1.0148653  | -2.2447977 | 2.0562194  |
| O  | 1.6834592  | 0.8781467  | -2.3049030 |
| H  | 2.4702061  | 0.4476790  | -2.6752426 |
| O  | 0.9828902  | 0.2880966  | 2.4503159  |
| H  | 0.4338938  | 0.9684340  | 2.8710190  |
| H  | 1.8434929  | 0.3265994  | 2.8971483  |
| O  | -0.9401022 | 0.9426712  | -1.6630399 |
| H  | -0.8105536 | 0.7807111  | -2.6103521 |

|   |            |            |            |
|---|------------|------------|------------|
| H | -1.8899420 | 0.8365360  | -1.5016645 |
| H | 1.8066022  | 1.8293345  | -2.4537661 |
| H | 1.5319520  | -2.9245305 | 0.7663945  |

EuBTP<sub>3</sub>

## BHLYP

|    |            |            |            |
|----|------------|------------|------------|
| Eu | 0.0001523  | -0.0046511 | -0.0000817 |
| N  | -1.2792103 | 2.2362179  | -0.0053527 |
| C  | -2.2444383 | 2.4648346  | 0.8815271  |
| C  | -0.9810466 | 3.1840204  | -0.8901170 |
| C  | -2.9553154 | 3.6579041  | 0.9197666  |
| C  | -2.5462897 | 1.3885936  | 1.8503117  |
| C  | -1.6367397 | 4.4083666  | -0.9220824 |
| C  | 0.0918087  | 2.8894692  | -1.8644806 |
| C  | -2.6411479 | 4.6444346  | 0.0009076  |
| H  | -3.7323439 | 3.7954270  | 1.6583806  |
| N  | -3.4740520 | 1.6136746  | 2.7750164  |
| N  | -1.8740793 | 0.2555428  | 1.7411090  |
| H  | -1.3564017 | 5.1476792  | -1.6589656 |
| N  | 0.7113471  | 1.7255439  | -1.7663356 |
| N  | 0.3774946  | 3.8058198  | -2.7841134 |
| H  | -3.1739844 | 5.5876394  | 0.0037179  |
| C  | -3.7049386 | 0.6447142  | 3.6203628  |
| N  | -2.0977140 | -0.7229083 | 2.5858357  |
| N  | 1.6579257  | 1.4144093  | -2.6199702 |
| C  | 1.3206473  | 3.5062241  | -3.6367090 |
| C  | -2.9917271 | -0.5597070 | 3.5250308  |
| H  | -4.4547042 | 0.7917646  | 4.3918991  |
| C  | 1.9777160  | 2.2691151  | -3.5552500 |
| H  | 1.5818978  | 4.2297065  | -4.4030814 |
| H  | -3.1555799 | -1.3810312 | 4.2125112  |
| H  | 2.7595890  | 1.9862735  | -4.2500049 |
| N  | -1.2969134 | -2.2454978 | 0.0009524  |
| C  | -2.2685221 | -2.4648572 | -0.8805901 |
| C  | -1.0045244 | -3.1949356 | 0.8853408  |
| C  | -2.9940192 | -3.6492941 | -0.9129567 |
| C  | -2.5614023 | -1.3863884 | -1.8494208 |
| C  | -1.6742540 | -4.4116851 | 0.9232784  |
| C  | 0.0784526  | -2.9114842 | 1.8520445  |
| C  | -2.6867400 | -4.6374540 | 0.0066204  |
| H  | -3.7765372 | -3.7791671 | -1.6471555 |
| N  | -3.5037142 | -1.5973477 | -2.7631419 |
| N  | -1.8679758 | -0.2649847 | -1.7513551 |
| H  | -1.3981387 | -5.1530700 | 1.6596944  |
| N  | 0.7093555  | -1.7542031 | 1.7485864  |
| N  | 0.3620161  | -3.8305469 | 2.7696584  |
| H  | -3.2309596 | -5.5741339 | 0.0088849  |
| C  | -3.7284751 | -0.6265273 | -3.6076732 |
| N  | -2.0841664 | 0.7147562  | -2.5973015 |
| N  | 1.6690018  | -1.4537519 | 2.5915000  |
| C  | 1.3170167  | -3.5411165 | 3.6126762  |
| C  | -2.9922302 | 0.5651698  | -3.5248929 |
| H  | -4.4909867 | -0.7616651 | -4.3688388 |
| C  | 1.9889332  | -2.3126437 | 3.5229232  |
| H  | 1.5765100  | -4.2665321 | 4.3778262  |
| H  | -3.1495386 | 1.3872511  | -4.2130056 |
| H  | 2.7822629  | -2.0396624 | 4.2085907  |

|   |           |            |            |
|---|-----------|------------|------------|
| N | 2.5797003 | 0.0101800  | 0.0035760  |
| C | 3.2506185 | 0.7433654  | 0.8880574  |
| C | 3.2608475 | -0.7081399 | -0.8855307 |
| C | 4.6386713 | 0.7926662  | 0.9170928  |
| C | 2.4578399 | 1.5210672  | 1.8647570  |
| C | 4.6494470 | -0.7221042 | -0.9269085 |
| C | 2.4798883 | -1.5092423 | -1.8531729 |
| C | 5.3459238 | 0.0447764  | -0.0086302 |
| H | 5.1381589 | 1.4059939  | 1.6536750  |
| N | 3.1071729 | 2.2243949  | 2.7869977  |
| N | 1.1401671 | 1.4745414  | 1.7654320  |
| H | 5.1576900 | -1.3233681 | -1.6674470 |
| N | 1.1626748 | -1.4951380 | -1.7423734 |
| N | 3.1384062 | -2.1996077 | -2.7786202 |
| H | 6.4291187 | 0.0590128  | -0.0140526 |
| C | 2.3746141 | 2.8877541  | 3.6412216  |
| N | 0.3960877 | 2.1368303  | 2.6191842  |
| N | 0.4267709 | -2.1783227 | -2.5868089 |
| C | 2.4145144 | -2.8850339 | -3.6229289 |
| C | 0.9749253 | 2.8387137  | 3.5571451  |
| H | 2.8692092 | 3.4728465  | 4.4106845  |
| C | 1.0147545 | -2.8703503 | -3.5265949 |
| H | 2.9164182 | -3.4606085 | -4.3948233 |
| H | 0.3379979 | 3.3730070  | 4.2520624  |
| H | 0.3850662 | -3.4225401 | -4.2140707 |

#### B3LYP

|    |            |            |            |
|----|------------|------------|------------|
| Eu | 0.0020490  | -0.0031914 | 0.0016454  |
| N  | -1.2802948 | 2.2424822  | -0.0058124 |
| C  | -2.2542320 | 2.4766076  | 0.8906563  |
| C  | -0.9851207 | 3.1980934  | -0.9032938 |
| C  | -2.9711793 | 3.6799124  | 0.9242384  |
| C  | -2.5577928 | 1.4010280  | 1.8682856  |
| C  | -1.6499702 | 4.4309670  | -0.9352428 |
| C  | 0.0886615  | 2.9041520  | -1.8851606 |
| C  | -2.6590698 | 4.6712965  | -0.0043601 |
| H  | -3.7528160 | 3.8181324  | 1.6705307  |
| N  | -3.4925233 | 1.6325105  | 2.8002263  |
| N  | -1.8780135 | 0.2513780  | 1.7587595  |
| H  | -1.3689961 | 5.1731614  | -1.6816367 |
| N  | 0.7208729  | 1.7262165  | -1.7835846 |
| N  | 0.3706882  | 3.8273810  | -2.8146587 |
| H  | -3.1971684 | 5.6212723  | -0.0029571 |
| C  | -3.7228896 | 0.6557324  | 3.6589107  |
| N  | -2.1012176 | -0.7318612 | 2.6194264  |
| N  | 1.6749153  | 1.4144334  | -2.6490657 |
| C  | 1.3222538  | 3.5239028  | -3.6785916 |
| C  | -3.0045201 | -0.5540916 | 3.5701800  |
| H  | -4.4794220 | 0.8086820  | 4.4355678  |
| C  | 1.9868845  | 2.2833141  | -3.5971469 |
| H  | 1.5793519  | 4.2541492  | -4.4528754 |
| H  | -3.1651486 | -1.3780400 | 4.2695445  |

|   |            |            |            |
|---|------------|------------|------------|
| H | 2.7735435  | 1.9980771  | -4.2996712 |
| N | -1.3009836 | -2.2531281 | 0.0013865  |
| C | -2.2814532 | -2.4771053 | -0.8894235 |
| C | -1.0091170 | -3.2128603 | 0.8950864  |
| C | -3.0123450 | -3.6722392 | -0.9194166 |
| C | -2.5762529 | -1.3973360 | -1.8648407 |
| C | -1.6869202 | -4.4387595 | 0.9309933  |
| C | 0.0766663  | -2.9317494 | 1.8679260  |
| C | -2.7054881 | -4.6670755 | 0.0073484  |
| H | -3.8000589 | -3.8018086 | -1.6608554 |
| N | -3.5226342 | -1.6147257 | -2.7887817 |
| N | -1.8777411 | -0.2578647 | -1.7619668 |
| H | -1.4088489 | -5.1847440 | 1.6747123  |
| N | 0.7206338  | -1.7609591 | 1.7607998  |
| N | 0.3573617  | -3.8585544 | 2.7946405  |
| H | -3.2546377 | -5.6106995 | 0.0098045  |
| C | -3.7472970 | -0.6344844 | -3.6448365 |
| N | -2.0959480 | 0.7288459  | -2.6204739 |
| N | 1.6867964  | -1.4588785 | 2.6172242  |
| C | 1.3208796  | -3.5653019 | 3.6489473  |
| C | -3.0109661 | 0.5649247  | -3.5622233 |
| H | -4.5135904 | -0.7760019 | -4.4140680 |
| C | 1.9982552  | -2.3319069 | 3.5616163  |
| H | 1.5777333  | -4.2983515 | 4.4206754  |
| H | -3.1672059 | 1.3919808  | -4.2589212 |
| H | 2.7944850  | -2.0555946 | 4.2569105  |
| N | 2.5868537  | 0.0137371  | 0.0034931  |
| C | 3.2664872  | 0.7478217  | 0.9008208  |
| C | 3.2765654  | -0.7087706 | -0.8959950 |
| C | 4.6664161  | 0.7932332  | 0.9296831  |
| C | 2.4734956  | 1.5262514  | 1.8848586  |
| C | 4.6771223  | -0.7228120 | -0.9331378 |
| C | 2.4963016  | -1.5109283 | -1.8720913 |
| C | 5.3792426  | 0.0438767  | -0.0047595 |
| H | 5.1684496  | 1.4076208  | 1.6763252  |
| N | 3.1297275  | 2.2305336  | 2.8171244  |
| N | 1.1374053  | 1.4828138  | 1.7818489  |
| H | 5.1879600  | -1.3276308 | -1.6816211 |
| N | 1.1611095  | -1.4996463 | -1.7588494 |
| N | 3.1631495  | -2.2032346 | -2.8058185 |
| H | 6.4709417  | 0.0564237  | -0.0087935 |
| C | 2.3889474  | 2.8993500  | 3.6819294  |
| N | 0.3882272  | 2.1499250  | 2.6479449  |
| N | 0.4202346  | -2.1858663 | -2.6175761 |
| C | 2.4313885  | -2.8926760 | -3.6624348 |
| C | 0.9823168  | 2.8531129  | 3.5984125  |
| H | 2.8907953  | 3.4854318  | 4.4588113  |
| C | 1.0246708  | -2.8781814 | -3.5698458 |
| H | 2.9410760  | -3.4704421 | -4.4404414 |
| H | 0.3403493  | 3.3891756  | 4.3014831  |
| H | 0.3905977  | -3.4304393 | -4.2675487 |

AmBTP<sub>3</sub>

## BHLYP

|    |            |            |            |
|----|------------|------------|------------|
| Am | 0.0003736  | -0.0000951 | 0.0000630  |
| N  | -1.3071474 | 2.2631317  | -0.0010859 |
| C  | -2.2843535 | 2.4810040  | 0.8763070  |
| C  | -1.0076213 | 3.2178060  | -0.8791789 |
| C  | -3.0067195 | 3.6673812  | 0.9097721  |
| C  | -2.5880825 | 1.4030737  | 1.8434950  |
| C  | -1.6755714 | 4.4356054  | -0.9145689 |
| C  | 0.0791585  | 2.9425189  | -1.8449869 |
| C  | -2.6929218 | 4.6592859  | -0.0031355 |
| H  | -3.7925877 | 3.7954957  | 1.6406009  |
| N  | -3.5193241 | 1.6262619  | 2.7659506  |
| N  | -1.9128923 | 0.2718703  | 1.7384370  |
| H  | -1.3936827 | 5.1799574  | -1.6456948 |
| N  | 0.7220379  | 1.7927576  | -1.7388468 |
| N  | 0.3516743  | 3.8604776  | -2.7675259 |
| H  | -3.2354761 | 5.5969230  | -0.0042390 |
| C  | -3.7485985 | 0.6579299  | 3.6121315  |
| N  | -2.1313810 | -0.7054372 | 2.5867502  |
| N  | 1.6790466  | 1.4939507  | -2.5857786 |
| C  | 1.3061618  | 3.5754377  | -3.6124912 |
| C  | -3.0278085 | -0.5430931 | 3.5238193  |
| H  | -4.5022739 | 0.8025626  | 4.3802786  |
| C  | 1.9870893  | 2.3514849  | -3.5227022 |
| H  | 1.5577844  | 4.3002776  | -4.3807770 |
| H  | -3.1881758 | -1.3620705 | 4.2148432  |
| H  | 2.7777682  | 2.0814387  | -4.2125118 |
| N  | -1.3072089 | -2.2632885 | 0.0011248  |
| C  | -2.2844535 | -2.4811352 | -0.8762370 |
| C  | -1.0081512 | -3.2177024 | 0.8796533  |
| C  | -3.0072315 | -3.6672703 | -0.9093248 |
| C  | -2.5879228 | -1.4033519 | -1.8436734 |
| C  | -1.6765011 | -4.4352740 | 0.9154135  |
| C  | 0.0788186  | -2.9425351 | 1.8452829  |
| C  | -2.6935350 | -4.6591273 | 0.0036741  |
| H  | -3.7933571 | -3.7952284 | -1.6399037 |
| N  | -3.5189207 | -1.6266896 | -2.7663499 |
| N  | -1.9129142 | -0.2720538 | -1.7384542 |
| H  | -1.3951403 | -5.1793285 | 1.6470455  |
| N  | 0.7223271  | -1.7931746 | 1.7385438  |
| N  | 0.3513086  | -3.8604650 | 2.7678549  |
| H  | -3.2359317 | -5.5968541 | 0.0045930  |
| C  | -3.7481520 | -0.6583968 | -3.6125802 |
| N  | -2.1312634 | 0.7051722  | -2.5869039 |
| N  | 1.6792752  | -1.4943154 | 2.5855336  |
| C  | 1.3062257  | -3.5756878 | 3.6124262  |
| C  | -3.0274511 | 0.5426748  | -3.5241658 |
| H  | -4.5017270 | -0.8030759 | -4.3808167 |
| C  | 1.9871035  | -2.3516994 | 3.5226689  |
| H  | 1.5582276  | -4.3007657 | 4.3803619  |
| H  | -3.1877871 | 1.3615778  | -4.2152931 |
| H  | 2.7776628  | -2.0815654 | 4.2125819  |

|   |           |            |            |
|---|-----------|------------|------------|
| N | 2.6142271 | 0.0001531  | -0.0000961 |
| C | 3.2913244 | 0.7362922  | 0.8784674  |
| C | 3.2913595 | -0.7360842 | -0.8785523 |
| C | 4.6799440 | 0.7676322  | 0.9130002  |
| C | 2.5093134 | 1.5383162  | 1.8454321  |
| C | 4.6799793 | -0.7672748 | -0.9131489 |
| C | 2.5093909 | -1.5382100 | -1.8454620 |
| C | 5.3821877 | 0.0005813  | -0.0003974 |
| H | 5.1837505 | 1.3829364  | 1.6449006  |
| N | 3.1677571 | 2.2317389  | 2.7693506  |
| N | 1.1921779 | 1.5204089  | 1.7387369  |
| H | 5.1838223 | -1.3830964 | -1.6445886 |
| N | 1.1922761 | -1.5207184 | -1.7384702 |
| N | 3.1678561 | -2.2314639 | -2.7694837 |
| H | 6.4654814 | 0.0011637  | -0.0009307 |
| C | 2.4433446 | 2.9143619  | 3.6152309  |
| N | 0.4546292 | 2.1986905  | 2.5863617  |
| N | 0.4547411 | -2.1988229 | -2.5862368 |
| C | 2.4434603 | -2.9141034 | -3.6153723 |
| C | 1.0429184 | 2.8925744  | 3.5246699  |
| H | 2.9449455 | 3.4930757  | 4.3849562  |
| C | 1.0430349 | -2.8922823 | -3.5248624 |
| H | 2.9450920 | -3.4928752 | -4.3850265 |
| H | 0.4135467 | 3.4413687  | 4.2150951  |
| H | 0.4136625 | -3.4407389 | -4.2155545 |

#### B3LYP

|    |            |            |            |
|----|------------|------------|------------|
| Am | 0.0005136  | 0.0000310  | -0.0000957 |
| N  | -1.3074573 | 2.2636763  | -0.0016200 |
| C  | -2.2954599 | 2.4859379  | 0.8834233  |
| C  | -1.0065731 | 3.2295734  | -0.8877680 |
| C  | -3.0227086 | 3.6831732  | 0.9140379  |
| C  | -2.6033230 | 1.4054347  | 1.8540492  |
| C  | -1.6819929 | 4.4567475  | -0.9209244 |
| C  | 0.0849841  | 2.9568137  | -1.8565771 |
| C  | -2.7068465 | 4.6828026  | -0.0040959 |
| H  | -3.8157223 | 3.8099462  | 1.6502328  |
| N  | -3.5431803 | 1.6306855  | 2.7828621  |
| N  | -1.9198078 | 0.2580146  | 1.7443648  |
| H  | -1.3958512 | 5.2062084  | -1.6579996 |
| N  | 0.7380443  | 1.7919314  | -1.7454592 |
| N  | 0.3601753  | 3.8833213  | -2.7853754 |
| H  | -3.2534201 | 5.6279043  | -0.0050557 |
| C  | -3.7713847 | 0.6517408  | 3.6394174  |
| N  | -2.1367667 | -0.7260346 | 2.6065133  |
| N  | 1.7003395  | 1.4885161  | -2.6059918 |
| C  | 1.3237893  | 3.5923023  | -3.6402823 |
| C  | -3.0425633 | -0.5526056 | 3.5556832  |
| H  | -4.5341208 | 0.7981963  | 4.4111923  |
| C  | 2.0035570  | 2.3597157  | -3.5550017 |
| H  | 1.5786927  | 4.3260881  | -4.4119011 |
| H  | -3.1980991 | -1.3758340 | 4.2569667  |
| H  | 2.7955851  | 2.0833331  | -4.2549800 |

|   |            |            |            |
|---|------------|------------|------------|
| N | -1.3075371 | -2.2635036 | 0.0014072  |
| C | -2.2954412 | -2.4858695 | -0.8837241 |
| C | -1.0068759 | -3.2292462 | 0.8877892  |
| C | -3.0227002 | -3.6830918 | -0.9142947 |
| C | -2.6033253 | -1.4053656 | -1.8543343 |
| C | -1.6823426 | -4.4563962 | 0.9210360  |
| C | 0.0845847  | -2.9564176 | 1.8566726  |
| C | -2.7070367 | -4.6825788 | 0.0040679  |
| H | -3.8155180 | -3.8100051 | -1.6506772 |
| N | -3.5434390 | -1.6304604 | -2.7829322 |
| N | -1.9198409 | -0.2579263 | -1.7445742 |
| H | -1.3962878 | -5.2057724 | 1.6582303  |
| N | 0.7382204  | -1.7919160 | 1.7449539  |
| N | 0.3590552  | -3.8824202 | 2.7861889  |
| H | -3.2537855 | -5.6275772 | 0.0052119  |
| C | -3.7718075 | -0.6514157 | -3.6393235 |
| N | -2.1365267 | 0.7259948  | -2.6069562 |
| N | 1.7014094  | -1.4889836 | 2.6046581  |
| C | 1.3231397  | -3.5916401 | 3.6406474  |
| C | -3.0424141 | 0.5526240  | -3.5560426 |
| H | -4.5350384 | -0.7975791 | -4.4106630 |
| C | 2.0045073  | -2.3600383 | 3.5538422  |
| H | 1.5772088  | -4.3248730 | 4.4130649  |
| H | -3.1977196 | 1.3757236  | -4.2575356 |
| H | 2.7974753  | -2.0841852 | 4.2529620  |
| N | 2.6150728  | 0.0004552  | -0.0003145 |
| C | 3.3012390  | 0.7434485  | 0.8862663  |
| C | 3.3013077  | -0.7423935 | -0.8869501 |
| C | 4.7016942  | 0.7732455  | 0.9183425  |
| C | 2.5187940  | 1.5499432  | 1.8568324  |
| C | 4.7017754  | -0.7721230 | -0.9189307 |
| C | 2.5189539  | -1.5494412 | -1.8571357 |
| C | 5.4096753  | 0.0005914  | -0.0002881 |
| H | 5.2078620  | 1.3950001  | 1.6559828  |
| N | 3.1829899  | 2.2491435  | 2.7878424  |
| N | 1.1835198  | 1.5331110  | 1.7448649  |
| H | 5.2080242  | -1.3940818 | -1.6563423 |
| N | 1.1836905  | -1.5332234 | -1.7448287 |
| N | 3.1832745  | -2.2485727 | -2.7880997 |
| H | 6.5014407  | 0.0006034  | -0.0003058 |
| C | 2.4484737  | 2.9355337  | 3.6442857  |
| N | 0.4390039  | 2.2128290  | 2.6064837  |
| N | 0.4393601  | -2.2145751 | -2.6053053 |
| C | 2.4489362  | -2.9365484 | -3.6434244 |
| C | 1.0411667  | 2.9085151  | 3.5577096  |
| H | 2.9558862  | 3.5206749  | 4.4182175  |
| C | 1.0416693  | -2.9110205 | -3.5558912 |
| H | 2.9564778  | -3.5217421 | -4.4172257 |
| H | 0.4053546  | 3.4546331  | 4.2585740  |
| H | 0.4059897  | -3.4587065 | -4.2556496 |



EuBTPPhen(NO<sub>3</sub>)

## BHLYP

|   |            |            |            |
|---|------------|------------|------------|
| N | 1.4671952  | 2.8068909  | 1.5462735  |
| N | 2.2636185  | 2.6450638  | 0.5163853  |
| C | 1.8526777  | 3.0216929  | -0.6672368 |
| C | 0.5717611  | 3.5691888  | -0.8328179 |
| N | -0.2115236 | 3.7339518  | 0.2003361  |
| C | 0.2731035  | 3.3522574  | 1.3792116  |
| N | -0.0055949 | 3.2232959  | 3.7403896  |
| C | -0.5531740 | 3.5551727  | 2.5887629  |
| C | -1.8439187 | 4.0900566  | 2.4906263  |
| H | -2.2456812 | 4.3476597  | 1.5207981  |
| C | -2.5681449 | 4.2700670  | 3.6428883  |
| H | -3.5731926 | 4.6742385  | 3.6041195  |
| C | -1.9961486 | 3.9409038  | 4.8814596  |
| C | -2.6762737 | 4.1325286  | 6.1274437  |
| H | -3.6877938 | 4.5212651  | 6.1091633  |
| C | -2.0652905 | 3.8505211  | 7.2996601  |
| H | -2.5759326 | 4.0088505  | 8.2424075  |
| C | -0.7223314 | 3.3519759  | 7.3278967  |
| C | -0.0295381 | 3.1049340  | 8.5226668  |
| H | -0.5211457 | 3.2692595  | 9.4746961  |
| C | 1.2754761  | 2.6825597  | 8.4753045  |
| H | 1.8516147  | 2.5148344  | 9.3741636  |
| C | 1.8663632  | 2.4712666  | 7.2237376  |
| N | 1.2177505  | 2.6499732  | 6.0887498  |
| C | -0.0374803 | 3.1114606  | 6.1215869  |
| C | -0.6886989 | 3.4171584  | 4.8706177  |
| N | 3.7696525  | 1.8427324  | 5.9142253  |
| C | 3.2867051  | 2.0707409  | 7.1246232  |
| N | 4.0023624  | 1.9894050  | 8.2421499  |
| C | 5.2668923  | 1.6887399  | 8.1031583  |
| C | 5.8025120  | 1.4765422  | 6.8255864  |
| N | 5.0384631  | 1.5489679  | 5.7656335  |
| N | 1.6670556  | -0.3954034 | 5.2792007  |
| N | 0.6129401  | -0.3901530 | 6.0601211  |
| C | 0.2652981  | -1.4990074 | 6.6605085  |
| C | 1.0049476  | -2.6749219 | 6.4632838  |
| N | 2.0527838  | -2.6705750 | 5.6821520  |
| C | 2.3579144  | -1.5105674 | 5.1064819  |
| N | 3.8210396  | -0.2621589 | 3.7055015  |
| C | 3.5328654  | -1.4439486 | 4.2105871  |
| C | 4.2811746  | -2.5926415 | 3.9223868  |
| H | 4.0045860  | -3.5389758 | 4.3655225  |
| C | 5.3515232  | -2.4797420 | 3.0701875  |
| H | 5.9484615  | -3.3487728 | 2.8183791  |
| C | 5.6800903  | -1.2271622 | 2.5282638  |
| C | 6.7968542  | -1.0266044 | 1.6537513  |
| H | 7.3963536  | -1.8858006 | 1.3762895  |
| C | 7.1063197  | 0.2079821  | 1.1984977  |
| H | 7.9603782  | 0.3604855  | 0.5489655  |
| C | 6.3263649  | 1.3489239  | 1.5771882  |
| C | 6.6530733  | 2.6562862  | 1.1856471  |

|    |            |            |            |
|----|------------|------------|------------|
| H  | 7.5122981  | 2.8285926  | 0.5476310  |
| C  | 5.8997335  | 3.7099778  | 1.6400900  |
| H  | 6.1444166  | 4.7327668  | 1.3908845  |
| C  | 4.7920238  | 3.4398772  | 2.4522611  |
| C  | 5.1944421  | 1.1833739  | 2.3977232  |
| C  | 4.8690770  | -0.1339420 | 2.8894520  |
| N  | 2.9621627  | 4.2173114  | 3.7877232  |
| C  | 3.9943127  | 4.5456954  | 3.0267229  |
| N  | 4.3705336  | 5.7964415  | 2.7800600  |
| C  | 3.6736297  | 6.7390981  | 3.3591670  |
| C  | 2.5979589  | 6.4071196  | 4.1939881  |
| N  | 2.2630887  | 5.1551401  | 4.3789744  |
| O  | 1.7135556  | -0.0050446 | 2.0273545  |
| N  | 0.4882354  | -0.1387300 | 2.2096390  |
| O  | -0.0050065 | 0.5484449  | 3.1255527  |
| O  | -0.1756323 | -0.8804365 | 1.5444800  |
| N  | 4.4342679  | 2.2142438  | 2.7849772  |
| H  | 5.8854508  | 1.6069017  | 8.9918346  |
| H  | 6.8490838  | 1.2400589  | 6.6733560  |
| H  | -0.6075768 | -1.4707392 | 7.3020786  |
| H  | 0.7204632  | -3.6025301 | 6.9508028  |
| H  | 2.5314195  | 2.8863451  | -1.5011041 |
| H  | 0.2112171  | 3.8626789  | -1.8141057 |
| H  | 3.9446084  | 7.7749393  | 3.1785232  |
| H  | 2.0092533  | 7.1628346  | 4.7007239  |
| Eu | 2.1406084  | 1.7335464  | 3.8458559  |

#### B3LYP

|    |            |           |            |
|----|------------|-----------|------------|
| Eu | 2.1324851  | 1.7250497 | 3.8397740  |
| N  | 1.4705082  | 2.8252728 | 1.5239187  |
| N  | 2.2781622  | 2.6763757 | 0.4834320  |
| C  | 1.8535174  | 3.0610511 | -0.7112319 |
| C  | 0.5592644  | 3.5940433 | -0.8776182 |
| N  | -0.2370855 | 3.7508100 | 0.1650477  |
| C  | 0.2551642  | 3.3681099 | 1.3532901  |
| N  | -0.0217314 | 3.2209160 | 3.7314396  |
| C  | -0.5750344 | 3.5615787 | 2.5677710  |
| C  | -1.8762564 | 4.0994200 | 2.4727167  |
| H  | -2.2792047 | 4.3616516 | 1.4949876  |
| C  | -2.6077723 | 4.2780745 | 3.6326114  |
| H  | -3.6210116 | 4.6845936 | 3.5929938  |
| C  | -2.0330888 | 3.9462860 | 4.8802197  |
| C  | -2.7145913 | 4.1382818 | 6.1303625  |
| H  | -3.7345813 | 4.5289694 | 6.1129226  |
| C  | -2.0971828 | 3.8565623 | 7.3155039  |
| H  | -2.6136879 | 4.0189196 | 8.2642739  |
| C  | -0.7493408 | 3.3590027 | 7.3470306  |
| C  | -0.0504829 | 3.1157884 | 8.5504537  |
| H  | -0.5462104 | 3.2831545 | 9.5094914  |
| C  | 1.2650026  | 2.6931973 | 8.5032299  |
| H  | 1.8468761  | 2.5285140 | 9.4093525  |
| C  | 1.8639583  | 2.4750143 | 7.2445635  |

|   |            |            |            |
|---|------------|------------|------------|
| N | 1.2088018  | 2.6488979  | 6.0954884  |
| C | -0.0572116 | 3.1126883  | 6.1279675  |
| C | -0.7114368 | 3.4165782  | 4.8705799  |
| N | 3.7822551  | 1.8460612  | 5.9230006  |
| C | 3.2896938  | 2.0739474  | 7.1497750  |
| N | 4.0068995  | 1.9861220  | 8.2797901  |
| C | 5.2868405  | 1.6888010  | 8.1398884  |
| C | 5.8328702  | 1.4916538  | 6.8566631  |
| N | 5.0676868  | 1.5598320  | 5.7767827  |
| N | 1.6644291  | -0.4084011 | 5.3073896  |
| N | 0.6073010  | -0.4038758 | 6.1068896  |
| C | 0.2647132  | -1.5308970 | 6.7130145  |
| C | 1.0024684  | -2.7137592 | 6.5031477  |
| N | 2.0541567  | -2.7125437 | 5.7032035  |
| C | 2.3595528  | -1.5415762 | 5.1236884  |
| N | 3.8198109  | -0.2781863 | 3.7037786  |
| C | 3.5317800  | -1.4736281 | 4.2162482  |
| C | 4.2865704  | -2.6292507 | 3.9210855  |
| H | 4.0088118  | -3.5823501 | 4.3700460  |
| C | 5.3618170  | -2.5170688 | 3.0586622  |
| H | 5.9619523  | -3.3934586 | 2.8032261  |
| C | 5.6926702  | -1.2564559 | 2.5115938  |
| C | 6.8107366  | -1.0547907 | 1.6318209  |
| H | 7.4143169  | -1.9204710 | 1.3496596  |
| C | 7.1249677  | 0.1923326  | 1.1718541  |
| H | 7.9857213  | 0.3428037  | 0.5163043  |
| C | 6.3464722  | 1.3389514  | 1.5526480  |
| C | 6.6760223  | 2.6553752  | 1.1587222  |
| H | 7.5404688  | 2.8281589  | 0.5134087  |
| C | 5.9195660  | 3.7172861  | 1.6192887  |
| H | 6.1673319  | 4.7482780  | 1.3692017  |
| C | 4.8031533  | 3.4502684  | 2.4391765  |
| C | 5.2029975  | 1.1724717  | 2.3834557  |
| C | 4.8749319  | -0.1501977 | 2.8782112  |
| N | 2.9611872  | 4.2294146  | 3.7902098  |
| C | 4.0070787  | 4.5620604  | 3.0173455  |
| N | 4.3894177  | 5.8229137  | 2.7686065  |
| C | 3.6919087  | 6.7748422  | 3.3640194  |
| C | 2.6174364  | 6.4432238  | 4.2120541  |
| N | 2.2643395  | 5.1788477  | 4.3969313  |
| O | 1.7412767  | 0.0093539  | 1.9805369  |
| N | 0.5004117  | -0.1518696 | 2.1844180  |
| O | 0.0040518  | 0.5258043  | 3.1377077  |
| O | -0.1738356 | -0.9042016 | 1.5100340  |
| N | 4.4378437  | 2.2118936  | 2.7747646  |
| H | 5.9047554  | 1.5980253  | 9.0393521  |
| H | 6.8911559  | 1.2653470  | 6.7045433  |
| H | -0.6086251 | -1.5007396 | 7.3691398  |
| H | 0.7190052  | -3.6509234 | 6.9934755  |
| H | 2.5423262  | 2.9374635  | -1.5505576 |
| H | 0.1907136  | 3.8860084  | -1.8665590 |
| H | 3.9674815  | 7.8185099  | 3.1799319  |
| H | 2.0332087  | 7.2051566  | 4.7340772  |

AmBTPhen(NO<sub>3</sub>)

## BHLYP

|   |            |            |            |
|---|------------|------------|------------|
| N | 1.4358508  | 2.8100638  | 1.5316652  |
| N | 2.2175193  | 2.6417819  | 0.4918450  |
| C | 1.7986481  | 3.0335523  | -0.6842537 |
| C | 0.5257933  | 3.6053137  | -0.8294119 |
| N | -0.2435772 | 3.7725237  | 0.2138268  |
| C | 0.2478240  | 3.3724787  | 1.3837035  |
| N | -0.0149689 | 3.2363126  | 3.7531321  |
| C | -0.5659396 | 3.5739254  | 2.6029921  |
| C | -1.8549938 | 4.1130436  | 2.5117754  |
| H | -2.2589538 | 4.3748830  | 1.5441478  |
| C | -2.5755277 | 4.2902086  | 3.6663534  |
| H | -3.5798215 | 4.6965612  | 3.6319033  |
| C | -2.0013578 | 3.9552159  | 4.9019113  |
| C | -2.6820746 | 4.1451287  | 6.1476300  |
| H | -3.6925222 | 4.5364984  | 6.1289415  |
| C | -2.0731380 | 3.8581250  | 7.3192281  |
| H | -2.5835790 | 4.0146514  | 8.2623497  |
| C | -0.7317958 | 3.3562643  | 7.3457644  |
| C | -0.0421098 | 3.1049288  | 8.5413884  |
| H | -0.5353855 | 3.2695231  | 9.4924898  |
| C | 1.2613989  | 2.6785074  | 8.4966237  |
| H | 1.8347597  | 2.5080012  | 9.3966484  |
| C | 1.8550276  | 2.4676575  | 7.2462330  |
| N | 1.2087633  | 2.6517359  | 6.1100999  |
| C | -0.0456586 | 3.1171748  | 6.1395442  |
| C | -0.6947982 | 3.4284028  | 4.8876746  |
| N | 3.7681409  | 1.8378917  | 5.9474344  |
| C | 3.2762991  | 2.0656747  | 7.1540019  |
| N | 3.9845235  | 1.9851879  | 8.2766172  |
| C | 5.2505610  | 1.6875913  | 8.1464561  |
| C | 5.7958470  | 1.4771263  | 6.8725566  |
| N | 5.0387673  | 1.5470310  | 5.8074317  |
| N | 1.6498405  | -0.4299811 | 5.2555538  |
| N | 0.5888713  | -0.4388692 | 6.0271903  |
| C | 0.2583869  | -1.5497466 | 6.6334925  |
| C | 1.0221921  | -2.7126046 | 6.4492907  |
| N | 2.0752610  | -2.6937267 | 5.6757549  |
| C | 2.3645998  | -1.5313741 | 5.0964755  |
| N | 3.8364885  | -0.2653208 | 3.7098370  |
| C | 3.5489983  | -1.4495314 | 4.2134605  |
| C | 4.3064987  | -2.5940613 | 3.9347343  |
| H | 4.0308402  | -3.5406135 | 4.3776388  |
| C | 5.3829286  | -2.4778699 | 3.0914693  |
| H | 5.9865048  | -3.3442815 | 2.8466464  |
| C | 5.7077972  | -1.2258782 | 2.5470523  |
| C | 6.8271979  | -1.0291957 | 1.6753615  |
| H | 7.4289778  | -1.8894575 | 1.4063974  |
| C | 7.1340657  | 0.2019594  | 1.2104602  |
| H | 7.9885644  | 0.3521315  | 0.5610047  |
| C | 6.3494140  | 1.3425274  | 1.5787887  |
| C | 6.6731072  | 2.6463232  | 1.1733620  |

|    |            |            |            |
|----|------------|------------|------------|
| H  | 7.5322187  | 2.8131898  | 0.5337462  |
| C  | 5.9174660  | 3.7032074  | 1.6153850  |
| H  | 6.1599180  | 4.7235102  | 1.3544285  |
| C  | 4.8107430  | 3.4399812  | 2.4314517  |
| C  | 5.2170798  | 1.1819980  | 2.4004610  |
| C  | 4.8909940  | -0.1335826 | 2.8999508  |
| N  | 2.9806886  | 4.2411782  | 3.7581054  |
| C  | 4.0144978  | 4.5545049  | 2.9935297  |
| N  | 4.3969155  | 5.8008038  | 2.7321022  |
| C  | 3.7061609  | 6.7538298  | 3.3010173  |
| C  | 2.6297767  | 6.4376182  | 4.1411214  |
| N  | 2.2876598  | 5.1897066  | 4.3397677  |
| O  | 1.7017839  | -0.0806648 | 2.0241486  |
| N  | 0.4663189  | -0.1668149 | 2.1589319  |
| O  | -0.0426229 | 0.5662618  | 3.0304584  |
| O  | -0.1950468 | -0.9080955 | 1.4901531  |
| N  | 4.4566040  | 2.2166288  | 2.7773554  |
| H  | 5.8632300  | 1.6070512  | 9.0393089  |
| H  | 6.8442113  | 1.2441625  | 6.7276305  |
| H  | -0.6194847 | -1.5340235 | 7.2685275  |
| H  | 0.7517165  | -3.6421803 | 6.9409596  |
| H  | 2.4642836  | 2.8916266  | -1.5274567 |
| H  | 0.1601184  | 3.9156722  | -1.8035414 |
| H  | 3.9825034  | 7.7860169  | 3.1081162  |
| H  | 2.0464503  | 7.2022564  | 4.6405230  |
| Am | 2.1296919  | 1.7281251  | 3.8433722  |

#### B3LYP

|    |            |           |            |
|----|------------|-----------|------------|
| Am | 2.1303025  | 1.7304661 | 3.8396848  |
| N  | 1.4478257  | 2.8575821 | 1.5191854  |
| N  | 2.2477518  | 2.7273648 | 0.4700747  |
| C  | 1.8073877  | 3.1172478 | -0.7172670 |
| C  | 0.5046909  | 3.6346572 | -0.8668535 |
| N  | -0.2837718 | 3.7721495 | 0.1843821  |
| C  | 0.2248883  | 3.3868832 | 1.3648921  |
| N  | -0.0358912 | 3.2220444 | 3.7490548  |
| C  | -0.5970590 | 3.5643379 | 2.5879790  |
| C  | -1.9024434 | 4.0925274 | 2.5014206  |
| H  | -2.3110979 | 4.3556555 | 1.5264453  |
| C  | -2.6305799 | 4.2609331 | 3.6645133  |
| H  | -3.6470843 | 4.6596730 | 3.6304802  |
| C  | -2.0484378 | 3.9295916 | 4.9084277  |
| C  | -2.7291890 | 4.1139642 | 6.1598481  |
| H  | -3.7515756 | 4.4983132 | 6.1446295  |
| C  | -2.1082129 | 3.8326145 | 7.3428341  |
| H  | -2.6238404 | 3.9881728 | 8.2931855  |
| C  | -0.7574611 | 3.3436815 | 7.3696908  |
| C  | -0.0575090 | 3.0998590 | 8.5722404  |
| H  | -0.5544645 | 3.2613862 | 9.5316305  |
| C  | 1.2595319  | 2.6834080 | 8.5240289  |
| H  | 1.8415766  | 2.5176586 | 9.4297576  |
| C  | 1.8607318  | 2.4733117 | 7.2650532  |
| N  | 1.2052555  | 2.6502794 | 6.1159096  |

|   |            |            |            |
|---|------------|------------|------------|
| C | -0.0643406 | 3.1066426  | 6.1491592  |
| C | -0.7226536 | 3.4096581  | 4.8931886  |
| N | 3.7900074  | 1.8600399  | 5.9485473  |
| C | 3.2890319  | 2.0793554  | 7.1735153  |
| N | 4.0004230  | 1.9906018  | 8.3072513  |
| C | 5.2832143  | 1.7039042  | 8.1735281  |
| C | 5.8383230  | 1.5175319  | 6.8924806  |
| N | 5.0786266  | 1.5836717  | 5.8086623  |
| N | 1.6462464  | -0.4173285 | 5.2960902  |
| N | 0.5781124  | -0.4191079 | 6.0814624  |
| C | 0.2356249  | -1.5476839 | 6.6844866  |
| C | 0.9841939  | -2.7258051 | 6.4849381  |
| N | 2.0457513  | -2.7182062 | 5.6985668  |
| C | 2.3518029  | -1.5455208 | 5.1228487  |
| N | 3.8299141  | -0.2784933 | 3.7175023  |
| C | 3.5353039  | -1.4737141 | 4.2299961  |
| C | 4.2914184  | -2.6305206 | 3.9442798  |
| H | 4.0087531  | -3.5818029 | 4.3937709  |
| C | 5.3723352  | -2.5226577 | 3.0890350  |
| H | 5.9727783  | -3.4006939 | 2.8401556  |
| C | 5.7072516  | -1.2650653 | 2.5381858  |
| C | 6.8279645  | -1.0739081 | 1.6597842  |
| H | 7.4294628  | -1.9438429 | 1.3865361  |
| C | 7.1453353  | 0.1678339  | 1.1885512  |
| H | 8.0066942  | 0.3107656  | 0.5321489  |
| C | 6.3682155  | 1.3186737  | 1.5579351  |
| C | 6.7005762  | 2.6296518  | 1.1484136  |
| H | 7.5656360  | 2.7923900  | 0.5013084  |
| C | 5.9463365  | 3.6986313  | 1.5951291  |
| H | 6.1962136  | 4.7257852  | 1.3319774  |
| C | 4.8290446  | 3.4443795  | 2.4181082  |
| C | 5.2242693  | 1.1636115  | 2.3907472  |
| C | 4.8908476  | -0.1545298 | 2.8963478  |
| N | 2.9885022  | 4.2539255  | 3.7581870  |
| C | 4.0363631  | 4.5677817  | 2.9799196  |
| N | 4.4244158  | 5.8226241  | 2.7098815  |
| C | 3.7334326  | 6.7880306  | 3.2907435  |
| C | 2.6600099  | 6.4765232  | 4.1477326  |
| N | 2.2992870  | 5.2171528  | 4.3520666  |
| O | 1.7802863  | -0.0013749 | 1.9303744  |
| N | 0.5333573  | -0.1576627 | 2.0979033  |
| O | 0.0121882  | 0.5233151  | 3.0378214  |
| O | -0.1253718 | -0.9063135 | 1.4049226  |
| N | 4.4622459  | 2.2104357  | 2.7692463  |
| H | 5.8966180  | 1.6133228  | 9.0760653  |
| H | 6.8993185  | 1.3009963  | 6.7454171  |
| H | -0.6461382 | -1.5229582 | 7.3293447  |
| H | 0.7005246  | -3.6644246 | 6.9722579  |
| H | 2.4898032  | 3.0093634  | -1.5638623 |
| H | 0.1231353  | 3.9298641  | -1.8498321 |
| H | 4.0134783  | 7.8269914  | 3.0878916  |
| H | 2.0824376  | 7.2497619  | 4.6602820  |
